# Supplementary material for: Chroman-4-One Derivatives Targeting Pteridine Reductase 1 and Showing Anti-Parasitic Activity
Source: PubMed Central journal article supplement (PMC6155272; doi:10.3390/molecules22030426), 2017-03-08
Supplement: molecules-22-00426-s001.pdf [file molecules-22-00426-s001.pdf]

# Chroman-4-one derivatives targeting pteridine reductase 1 and showing anti-parasitic activity

Flavio Di Pisa <sup>1</sup>, Giacomo Landi <sup>1</sup>, Lucia Dello Iacono <sup>1</sup>, Cecilia Pozzi <sup>1</sup>, Chiara Borsari <sup>2</sup>, Stefania Ferrari <sup>2</sup>, Matteo Santucci <sup>2</sup>, Nuno Santarem <sup>3</sup>, Anabela Cordeiro-da-Silva <sup>3</sup>, Carolina B. Moraes <sup>4</sup>, Laura M. Alcantara <sup>4</sup>, Vanessa Fontana <sup>4</sup>, Lucio H. Freitas-Junior <sup>4,5</sup>, Sheraz Gul <sup>6</sup>, Maria Kuzikov <sup>6</sup>, Birte Behrens <sup>6</sup>, Ina Pöhner <sup>7</sup>, Rebecca C. Wade <sup>7,8,9</sup>, Maria Paola Costi <sup>2,\*</sup> and Stefano Mangani <sup>1,10,\*</sup>

## Table of contents:

|                                                                                                                                                                                                    |    |
|----------------------------------------------------------------------------------------------------------------------------------------------------------------------------------------------------|----|
| <b>Characterization of compound 1-3.</b>                                                                                                                                                           | S2 |
| <b>Table S1.</b> Compounds inhibitory activity towards <i>TbPTR1</i> and <i>LmPTR1</i> .                                                                                                           | S3 |
| <b>Table S2.</b> Data collection and processing statistics.                                                                                                                                        | S4 |
| <b>Table S3.</b> Structure solution and refinement.                                                                                                                                                | S5 |
| <b>Table S4.</b> ADME-Tox data.                                                                                                                                                                    | S6 |
| <b>Table S5.</b> Anti-parasitic activity of compounds <b>1-3</b> against <i>T. brucei</i> at 10 $\mu$ M and <i>L. infantum</i> at 50 $\mu$ M, EC <sub>50</sub> towards <i>T. brucei</i> and NOAEL. | S7 |

### Characterization of compounds 1-3

**6-hydroxy-2-(3-hydroxyphenyl)chroman-4-one (1)** was isolated as a yellow solid in a 26% yield. Mp 240 °C. <sup>1</sup>H NMR (DMSO, 400 MHz) δ ppm: 9.51 (br s, 1H, 3'-OH), 9.42 (br s, 1H, 6-OH), 7.20 (dd, 1H, J<sub>5',4'</sub> = 8.2 Hz, J<sub>5',6'</sub> = 7.4 Hz, H-5'), 7.12 (d, 1H, J<sub>5,7</sub> = 2.9 Hz, H-5), 7.04 (dd, 1H, J<sub>7,8</sub> = 8.8 Hz, J<sub>7,5</sub> = 2.9 Hz, H-7), 6.95 (d, 1H, J<sub>8,7</sub> = 8.8 Hz, H-8), 6.91 (m, 2H, H-6' + H-2'), 6.76 (d, 1H, J<sub>4',5'</sub> = 8.2 Hz, H-4'), 5.47 (dd, 1H, J<sub>2,3b</sub> = 12.7 Hz, J<sub>2,3a</sub> = 2.6 Hz, H-2), 3.10 (dd, 1H, J<sub>3b,3a</sub> = 16.8 Hz, J<sub>3b,2</sub> = 12.7 Hz, Hb-3), 2.76 (dd, 1H, J<sub>3a,3b</sub> = 16.8 Hz, J<sub>3a,2</sub> = 2.6 Hz, Ha-3). <sup>13</sup>C NMR (DMSO, 100 MHz) δ ppm: 192.17, 157.90, 154.81, 152.03, 141.11, 129.99, 124.98, 121.33, 119.46, 117.43, 115.69, 113.79, 110.39, 79.08, 44.22. ESI-HRMS calcd for C<sub>15</sub>H<sub>13</sub>O<sub>4</sub> [M+H]<sup>+</sup>257.0808, found 257.0808.

**6-hydroxy-2-(4-hydroxyphenyl)chroman-4-one (2)** was isolated as a yellow solid in a 31% yield. Mp 230 °C. <sup>1</sup>H NMR (CD<sub>3</sub>OD, 400 MHz) δ ppm: 7.33 (d, 2H, J<sub>2',3'/5',6'</sub> = 8.6 Hz, H-2' + H-6'), 7.22 (d, 1H, J<sub>5,7</sub> = 3.0 Hz, H-5), 7.04 (dd, 1H, J<sub>7,8</sub> = 8.9 Hz, J<sub>7,5</sub> = 3.0 Hz, H-7), 6.90 (d, 1H, J<sub>8,7</sub> = 8.9 Hz, H-8), 6.84 (d, 2H, J<sub>3',2'/5',6'</sub> = 8.6 Hz, H-3' + H-5'), 5.34 (dd, 1H, J<sub>2,3b</sub> = 13.3 Hz, J<sub>2,3a</sub> = 2.8 Hz, H-2), 3.08 (dd, 1H, J<sub>3b,3a</sub> = 17.0 Hz, J<sub>3b,2</sub> = 13.3 Hz, Hb-3), 2.74 (dd, 1H, J<sub>3a,3b</sub> = 17.0 Hz, J<sub>3a,2</sub> = 2.8 Hz, Ha-3). <sup>13</sup>C NMR (CD<sub>3</sub>OD, 100 MHz) δ ppm: 193.46, 157.50, 155.63, 151.51, 130.09, 127.59 (2C), 124.55, 120.77, 118.76, 114.90 (2C), 109.95, 79.45, 44.00. ESI-HRMS calcd for C<sub>15</sub>H<sub>13</sub>O<sub>4</sub> [M+H]<sup>+</sup>257.0808, found 257.0805.

**2-(3,4-dihydroxyphenyl)-6-hydroxychroman-4-one (3)** was isolated as an orange solid in a 26% yield. Mp 220 °C. <sup>1</sup>H NMR (DMSO, 400 MHz) δ ppm: 9.35 (br s, 1H, OH), 8.90 (br s, 2H, OH), 7.11 (d, 1H, J<sub>5,7</sub> = 3.0 Hz, H-5), 7.02 (dd, 1H, J<sub>7,8</sub> = 8.8 Hz, J<sub>7,5</sub> = 3.0 Hz, H-7), 6.91 (d, 1H, J<sub>8,7</sub> = 8.8 Hz, H-8), 6.90 (m, 1H, H-2'), 6.75 (m, 2H, H-5' + H-6'), 5.35 (dd, 1H, J<sub>2,3b</sub> = 12.8 Hz, J<sub>2,3a</sub> = 2.6 Hz, H-2), 3.10 (dd, 1H, J<sub>3b,3a</sub> = 16.8 Hz, J<sub>3b,2</sub> = 12.8 Hz, Hb-3), 2.68 (dd, 1H, J<sub>3a,3b</sub> = 16.8 Hz, J<sub>3a,2</sub> = 2.6 Hz, Ha-3). <sup>13</sup>C NMR (DMSO, 100 MHz) δ ppm: 192.52, 154.99, 151.90, 146.01, 145.62, 130.49, 124.93, 121.26, 119.42, 118.27, 115.77, 114.74, 110.36, 79.22, 44.13. ESI-HRMS calcd for C<sub>15</sub>H<sub>13</sub>O<sub>5</sub> [M+H]<sup>+</sup>273.0757, found 273.0759.

**Table S1.**Inhibitory activity of compounds against *Tb*PTR1 and *Lm*PTR1.

The control compound was pyrimetamine (100% of inhibition at 50  $\mu$ M against both enzymes).

The SD values of IC<sub>50</sub>s agreed to  $\pm$  10%.

| Comp. | % Inhibition                   | SD                             | IC <sub>50</sub>             | % Inhibition                   | STD                            | IC <sub>50</sub>             |
|-------|--------------------------------|--------------------------------|------------------------------|--------------------------------|--------------------------------|------------------------------|
|       | <i>Lm</i> PTR1<br>(50 $\mu$ M) | % Inhibition<br><i>Lm</i> PTR1 | <i>Lm</i> PTR1<br>( $\mu$ M) | <i>Tb</i> PTR1<br>(50 $\mu$ M) | % Inhibition<br><i>Tb</i> PTR1 | <i>Tb</i> PTR1<br>( $\mu$ M) |
| 1     | 50.4                           | 1.6                            | 57.0                         | 81.3                           | 0.6                            | 31.0                         |
| 2     | 56.0                           | 3.4                            | 35.0                         | 17.7                           | 1.6                            | 133.0                        |
| 3     | 69.0                           | 0.3                            | 36.0                         | 34.6                           | 1.9                            | 82.0                         |
| 1A    | 86.2                           | 0.4                            | 12.5                         | 96.1                           | 0.1                            | 4.3                          |
| 2A    | 10.8                           | 1.3                            | -                            | 2.6                            | 1.5                            | -                            |
| 3A    | 75.4                           | 0.6                            | 35.0                         | 53.1                           | 1.0                            | 38.0                         |

**Table S2.** Data collection and processing statistics. Values for the outer shell are given in parentheses.

|                                                            | <i>Lm</i> PTR1+NADP <sup>+</sup>              |                                               | <i>Tb</i> PTR1+NADP <sup>+</sup> |
|------------------------------------------------------------|-----------------------------------------------|-----------------------------------------------|----------------------------------|
|                                                            | Compound 1                                    | Compound 3                                    | Compound 1                       |
| PDB code                                                   | <b>5L4N</b>                                   | <b>5L42</b>                                   | <b>5K6A</b>                      |
| Diffraction source                                         | DLS-I04                                       | XRD-1                                         | XRD-1                            |
| Wavelength (Å)                                             | 0.9795                                        | 1.0000                                        | 1.0000                           |
| Temperature (K)                                            | 100                                           | 100                                           | 100                              |
| Detector                                                   | Pilatus 6M-F                                  | Pilatus 2M                                    | Pilatus 2M                       |
| Rotation range per image (°)                               | 0.2                                           | 1                                             | 1                                |
| Exposure time per image (s)                                | 0.2                                           | 35                                            | 15                               |
| Space group                                                | P2 <sub>1</sub> 2 <sub>1</sub> 2 <sub>1</sub> | P2 <sub>1</sub> 2 <sub>1</sub> 2 <sub>1</sub> | P2 <sub>1</sub>                  |
| No. of subunit in ASU                                      | 4                                             | 4                                             | 4                                |
| <i>a</i> , <i>b</i> , <i>c</i> (Å)                         | 94.70, 104.25, 137.04                         | 94.70, 104.19, 137.04                         | 74.72, 89.89, 82.68              |
| $\beta$ (°), for monoclinic cell                           |                                               |                                               | 115.75                           |
| Resolution range (Å)                                       | 94.70-2.35 (2.48-2.35)                        | 47.35-2.10 (2.21-2.10)                        | 41.74-1.70 (1.79-1.70)           |
| Total No. of reflections                                   | 186708 (26441)                                | 328980 (47347)                                | 225595 (31568)                   |
| No. of unique reflections                                  | 54151 (7950)                                  | 79156 (11386)                                 | 100585 (14665)                   |
| Completeness (%)                                           | 95.3 (97.1)                                   | 99.5 (99.5)                                   | 93.0 (93.3)                      |
| Redundancy                                                 | 3.4 (3.3)                                     | 4.2(4.2)                                      | 2.2 (2.2)                        |
| $\langle I/\sigma(I) \rangle$                              | 7.5 (2.7)                                     | 5.6 (2.9)                                     | 6.8 (1.9)                        |
| $R_{\text{meas}}\ddagger$                                  | 15.3 (51.6)                                   | 15.3 (33.1)                                   | 11.2 (42.4)                      |
| Overall <i>B</i> factor from Wilson plot (Å <sup>2</sup> ) | 17.8                                          | 13.6                                          | 7.1                              |

**Table S3.** Structure solution and refinement. Values for the outer shell are given in parentheses.

|                                                      | LmPTR1+NADP <sup>+</sup> |                        | TbPTR1+NADP <sup>+</sup> |
|------------------------------------------------------|--------------------------|------------------------|--------------------------|
|                                                      | Compound 1               | Compound 3             | Compound 1               |
| PDB code                                             | <b>5L4N</b>              | <b>5L42</b>            | <b>5K6A</b>              |
| Resolution range (Å)                                 | 82.97-2.35 (2.41-2.35)   | 47.35-2.10 (2.16-2.10) | 41.74-1.70 (1.74-1.70)   |
| Completeness (%)                                     | 94.61 (96.86)            | 99.22 (99.36)          | 92.66 (91.37)            |
| No. of reflections, working set                      | 51393 (3869)             | 75089 (5450)           | 95660 (6902)             |
| No. of reflections, test set                         | 2714 (168)               | 3968 (289)             | 4859 (365)               |
| Final $R_{\text{cryst}}$                             | 16.6 (22.4)              | 16.7 (18.3)            | 18.5 (30.9)              |
| Final $R_{\text{free}}$                              | 21.8 (26.9)              | 21.4 (21.7)            | 22.7 (32.5)              |
| Cruickshank DPI                                      | 0.28                     | 0.17                   | 0.12                     |
| No. of non-H atoms                                   |                          |                        |                          |
| Protein                                              | 7739                     | 7828                   | 7336                     |
| Ligand                                               | 266                      | 354                    | 276                      |
| Water                                                | 563                      | 843                    | 775                      |
| Total                                                | 8568                     | 9025                   | 8387                     |
| R.m.s. deviations                                    |                          |                        |                          |
| Bonds (Å)                                            | 0.017                    | 0.019                  | 0.017                    |
| Angles (°)                                           | 1.878                    | 1.955                  | 1.897                    |
| Average $B$ factors (Å <sup>2</sup> )                | 24.15                    | 22.84                  | 19.86                    |
| Estimate error on coordinates based on $R$ value (Å) | 0.28                     | 0.17                   | 0.12                     |
| Ramachandran plot                                    |                          |                        |                          |
| Most favored (%)                                     | 95.0                     | 95.0                   | 97.0                     |
| Allowed (%)                                          | 5.0                      | 5.0                    | 3.0                      |

**Table S4.** ADME-Tox data.

\* A549 and W1-38 cell growth: 100% = not cytotoxic, 0% = cytostatic. \*\* Mitochondrial toxicity:100% = mitotoxic, 0% = not mitotoxic.

NI = no inhibition

- Not measured

The SD values of IC<sub>50</sub>s agreed to ± 10%.

| Comp. | % Cell growth A549* (10 µM) | SD % Cell growth A549 | GIC <sub>50</sub> A549 (µM) | % Cell growth W1-38* (10 µM) | SD % Cell growth W1-38 | GIC <sub>50</sub> W1-38 (µM) |
|-------|-----------------------------|-----------------------|-----------------------------|------------------------------|------------------------|------------------------------|
| 1     | 137                         | 7                     | > 100                       | 108                          | 29                     | 84                           |
| 2     | 105                         | 9                     | > 100                       | 91                           | 11                     | > 100                        |
| 3     | 124                         | 4                     | 93                          | 86                           | 6                      | 41                           |

| Comp. | % Mitochondrial toxicity ** | SD % Mitochondrial toxicity (10 µM) | IC <sub>50</sub> Mitochondria (µM) | % Inhibition Aurora B kinase (10 µM) | SD % Inhibition Aurora B kinase |
|-------|-----------------------------|-------------------------------------|------------------------------------|--------------------------------------|---------------------------------|
| 1     | 6                           | 4                                   | > 100                              | NI                                   | -                               |
| 2     | NI                          | -                                   | > 100                              | NI                                   | -                               |
| 3     | NI                          | -                                   | > 100                              | NI                                   | -                               |

| Comp. | % Inhibition hERG (10 µM) | SD % Inhibition hERG | IC <sub>50</sub> hERG (µM) | % Inhibition CYP1A2 (10 µM) | SD % Inhibition CYP1A2 | IC <sub>50</sub> CYP1A2 (µM) |
|-------|---------------------------|----------------------|----------------------------|-----------------------------|------------------------|------------------------------|
| 1     | 7                         | 2                    | > 100                      | 3                           | 6                      | 29                           |
| 2     | 14                        | 8                    | > 100                      | NI                          | -                      | 59                           |
| 3     | 20                        | 8                    | 64                         | NI                          | -                      | 62                           |

| Comp. | % Inhibition CYP2C9 (10 µM) | SD % Inhibition CYP2C9 | IC <sub>50</sub> CYP2C9 (µM) | % Inhibition CYP2C19 (10 µM) | SD % Inhibition CYP2C19 | IC <sub>50</sub> CYP2C19 (µM) |
|-------|-----------------------------|------------------------|------------------------------|------------------------------|-------------------------|-------------------------------|
| 1     | NI                          | -                      | 72                           | 77.15                        | 3.06                    | 1                             |
| 2     | NI                          | -                      | > 100                        | 44.54                        | 5.51                    | 4                             |
| 3     | NI                          | -                      | 4                            | 2.68                         | 11.85                   | 5                             |

| Comp. | % Inhibition CYP2D6 (10 µM) | SD % Inhibition CYP2D6 | IC <sub>50</sub> CYP2D6 (µM) | % Inhibition CYP3A4 (10 µM) | SD % Inhibition CYP3A4 | IC <sub>50</sub> CYP3A4 (µM) |
|-------|-----------------------------|------------------------|------------------------------|-----------------------------|------------------------|------------------------------|
| 1     | NI                          | -                      | 85                           | NI                          | -                      | 80                           |
| 2     | NI                          | -                      | 94                           | NI                          | -                      | > 100                        |
| 3     | NI                          | -                      | > 100                        | NI                          | -                      | 65                           |

**Table S5.** Anti-parasitic activity of compounds **1-3** against *T. brucei* at 10  $\mu$ M and *L. infantum* at 50  $\mu$ M, EC<sub>50</sub> towards *T. brucei* and NOAEL. The reference compounds were pentamidine (IC<sub>50</sub> = 1.55  $\pm$  0.24 nM) for *T. brucei* and miltefosine (IC<sub>50</sub> = 2.65  $\pm$  0.40  $\mu$ M) for *L. infantum*. The SD values of IC<sub>50</sub>s agreed to  $\pm$  10%. ND: Not Determined

| <b>Comp.</b> | % inh. <i>L. infantum</i><br>(50 $\mu$ M) | % inh. <i>T. brucei</i><br>(10 $\mu$ M) | EC <sub>50</sub> <i>T. brucei</i> | CC <sub>50</sub> $\pm$ SD or<br>NOAEL |
|--------------|-------------------------------------------|-----------------------------------------|-----------------------------------|---------------------------------------|
| <b>1</b>     | 31                                        | 44                                      | 12.58 $\pm$ 1.69                  | >100                                  |
| <b>2</b>     | 29                                        | 49                                      | 13.02 $\pm$ 1.82                  | >100                                  |
| <b>3</b>     | 3                                         | 14                                      | 34.82 $\pm$ 1.10                  | >100                                  |
